# Supplementary material for: Factors that influence smokers’ and ex-smokers’ use of IQOS: a qualitative study of IQOS users and ex-users in the UK
Source: HighWire-hosted journal article supplement (doi:10.1136/tobaccocontrol-2019-055306), 2020-01-15
Supplement: tobaccocontrol-2019-055306supp001_data_supplement.pdf [file tobaccocontrol-2019-055306supp001_data_supplement.pdf]

Supplementary Table 1. *Daily IQOS users (n=20) – Cigarette smoking and e-cigarette status*

| <b>Cigarette smoking</b> | <b>Daily<br/>(n = 2)</b> | <b>Weekly<br/>(n = 3)</b> | <b>Monthly<br/>(n = 3)</b> | <b>Less than<br/>monthly<br/>(n = 5)</b> | <b>Ex-smoker<br/>(n = 7)</b> | <b>Total<br/>(n = 20)</b> |
|--------------------------|--------------------------|---------------------------|----------------------------|------------------------------------------|------------------------------|---------------------------|
| <b>E-cigarette use</b>   |                          |                           |                            |                                          |                              |                           |
| <b>Daily</b>             | 0                        | 0                         | 1                          | 0                                        | 0                            | 1                         |
| <b>Weekly</b>            | 0                        | 0                         | 0                          | 0                                        | 0                            | 0                         |
| <b>Monthly</b>           | 0                        | 0                         | 0                          | 0                                        | 0                            | 0                         |
| <b>Less than monthly</b> | 1                        | 0                         | 0                          | 0                                        | 0                            | 1                         |
| <b>Past use</b>          | 1                        | 3                         | 2                          | 4                                        | 7                            | 17                        |
| <b>Never</b>             | 0                        | 0                         | 0                          | 1                                        | 0                            | 1                         |

Supplementary Table 2. *Weekly IQOS users (n=2) – Cigarette smoking and e-cigarette status*

| <b>Cigarette smoking</b> | <b>Daily<br/>(n = 1)</b> | <b>Weekly<br/>(n = 1)</b> | <b>Monthly<br/>(n = 0)</b> | <b>Less than<br/>monthly<br/>(n = 0)</b> | <b>Ex-smoker<br/>(n = 0)</b> | <b>Total<br/>(n = 2)</b> |
|--------------------------|--------------------------|---------------------------|----------------------------|------------------------------------------|------------------------------|--------------------------|
| <b>E-cigarette use</b>   |                          |                           |                            |                                          |                              |                          |
| <b>Daily</b>             | 0                        | 0                         | 0                          | 0                                        | 0                            | 0                        |
| <b>Weekly</b>            | 0                        | 0                         | 0                          | 0                                        | 0                            | 0                        |
| <b>Monthly</b>           | 0                        | 0                         | 0                          | 0                                        | 0                            | 0                        |
| <b>Less than monthly</b> | 0                        | 0                         | 0                          | 0                                        | 0                            | 0                        |
| <b>Past use</b>          | 1                        | 1                         | 0                          | 0                                        | 0                            | 2                        |
| <b>Never</b>             | 0                        | 0                         | 0                          | 0                                        | 0                            | 0                        |

Supplementary Table 3. *Ex-IQOS users (n=8) – Cigarette smoking and e-cigarette status*

| <b>Cigarette smoking</b> | <b>Daily<br/>(n = 4)</b> | <b>Weekly<br/>(n = 0)</b> | <b>Monthly<br/>(n = 1)</b> | <b>Less than<br/>monthly<br/>(n = 1)</b> | <b>Ex- smoker<br/>(n = 2)</b> | <b>Total<br/>(n = 8)</b> |
|--------------------------|--------------------------|---------------------------|----------------------------|------------------------------------------|-------------------------------|--------------------------|
| <b>E-cigarette use</b>   |                          |                           |                            |                                          |                               |                          |
| <b>Daily</b>             | 0                        | 0                         | 1                          | 0                                        | 0                             | 1                        |
| <b>Weekly</b>            | 0                        | 0                         | 0                          | 0                                        | 0                             | 0                        |
| <b>Monthly</b>           | 1                        | 0                         | 0                          | 0                                        | 0                             | 1                        |
| <b>Less than monthly</b> | 0                        | 0                         | 0                          | 0                                        | 0                             | 0                        |
| <b>Past use</b>          | 2                        | 0                         | 0                          | 1                                        | 2                             | 5                        |
| <b>Never</b>             | 1                        | 0                         | 0                          | 0                                        | 0                             | 1                        |
